# Supplementary material for: Rapid analysis of bioactive compounds from citrus samples by direct analysis in real-time mass spectrometry combined with chemometrics
Source: Royal Society of Chemistry journal article supplement (doi:10.1039/d4an00316k), 2024-01-01
Supplement: d4an00316k1.pdf [file d4an00316k1.pdf]

1

## Supplementary material

2

### 3 **Rapid analysis of bioactive compounds from citrus samples** 4 **by direct analysis in real-time mass spectrometry combined** 5 **with chemometrics**

6

7 Xingyu Wang, Yilin Chen, Yanqiao Xie, Yamin Liu, Linhong Fan, Linnan Li \*,

8 Zhengtao Wang, Li Yang \*

9

10 The MOE Key Laboratory of Standardization of Chinese Medicines, the SATCM Key  
11 Laboratory of New Resources and Quality Evaluation of Chinese Medicines, Shanghai  
12 Key Laboratory of Compound Chinese Medicine, Institute of Chinese Materia Medica,  
13 Shanghai University of Traditional Chinese Medicine, Shanghai 201203, China

14

15 \* Corresponding author

16

17 Prof. Li Yang, E-mail: yl7@shutcm.edu.cn; Tel: +86-021-51322506

18 Prof. Linnan Li, E-mail: linnanli@shutcm.edu.cn; Tel: +86-021-51322506

| 19 | <b>Contents</b>                                                                                   |    |
|----|---------------------------------------------------------------------------------------------------|----|
| 20 | Table S1 Kruskal-Wallis test ( $p < 0.05$ is valid).....                                          | 3  |
| 21 | Table S2 Information for analyte, regression equation, linear range, limit of detection           |    |
| 22 | (LOD), limit of quantification (LOQ), and correlation coefficient ( $R^2$ ) by proposed DART-     |    |
| 23 | MS method. ....                                                                                   | 4  |
| 24 | Table S3 Method validation of synephrine in QP-3 samples by DART-MS. ....                         | 4  |
| 25 | Table S4 Comparison of DART-MS and HPLC-MS methods for the analysis of synephrine in              |    |
| 26 | QP, CP, and GCP samples. ....                                                                     | 5  |
| 27 | Figure S1 The chemical structures and information of stand compounds used in this study. ....     | 6  |
| 28 | Figure S2 The effect of gas heater temperature on the ionization efficiency of synephrine. ....   | 7  |
| 29 | Figure S3 The effect of MS capillary temperature on the ionization efficiency of synephrine. .... | 7  |
| 30 | Figure S4 The effect of distance between the ceramic tube of DART and MS inlet on the             |    |
| 31 | ionization efficiency of synephrine. ....                                                         | 8  |
| 32 | Figure S5 The effect of MS capillary voltage on the ionization efficiency of synephrine. ....     | 8  |
| 33 | Figure S6 The effect of MS tube lens voltage on the ionization efficiency of synephrine. ....     | 9  |
| 34 | Figure S7 Comparison of DART-MS analysis of extracted and unextracted samples. ....               | 9  |
| 35 | Figure S8 PCA score plots (a) and PLS-DA (b) in the pairwise comparison between QP, CP,           |    |
| 36 | and GCP samples. Samples are coloured based on their name. ....                                   | 10 |
| 37 | Figure S9 Discriminant function score plot. ....                                                  | 10 |
| 38 | Figure S10 OPLS-DA score plots (a) and S-plot (b) in the pairwise comparison between              |    |
| 39 | inside and outside parts of CP samples. ....                                                      | 11 |
| 40 | Figure S11 OPLS-DA score plots (a) and S-plot (b) in the pairwise comparison between              |    |
| 41 | inside and outside parts of QP samples. ....                                                      | 11 |
| 42 | Figure S12 The results of HPLC-MS inside and outside parts of CP samples. ....                    | 12 |
| 43 | Figure S13 The results of HPLC-MS inside and outside parts of QP samples. ....                    | 13 |
| 44 |                                                                                                   |    |
| 45 |                                                                                                   |    |

46 **Table S1** Kruskal-Wallis test (p<0.05 is valid)

| Name                           | P value |
|--------------------------------|---------|
| Synephrine                     | 0.001   |
| Caffeicacid                    | 0.004   |
| FerulicAcid                    | 0.026   |
| Tetramethoxyflavone            | 0.003   |
| Tryptophan                     | 0.268   |
| Adenosine                      | 0.09    |
| Naringin                       | 0.676   |
| Guanosine                      | 0.062   |
| Hesperetin                     | 0.198   |
| nobiletin                      | 0.587   |
| Trimethoxyflavone              | 0.113   |
| Tetramethoxyflavone            | 0.038   |
| Dihydroxytrimethoxyflavone     | 0.368   |
| Monohydroxytetramethoxyflavone | 0.444   |
| Heptamethoxyflavone            | 0.003   |
| Dihydroxyhexamethoxyflavone    | 0.004   |
| Orientin                       | 0.236   |
| Tricin                         | 0.296   |
| Xanthohumol                    | 0.271   |
| Curcumin                       | 0.796   |

47

48

49

50

51

52

53

54

55

56

57 **Table S2** Information for analyte, regression equation, linear range, limit of detection  
 58 (LOD), limit of quantification (LOQ), and correlation coefficient (R<sup>2</sup>) by proposed  
 59 DART-MS method.

| Analyte    | Regression equation | Linear range (µg·mL <sup>-1</sup> ) | LOD (ng·mL <sup>-1</sup> ) | LOQ (ng·mL <sup>-1</sup> ) | Correlation coefficient (R <sup>2</sup> ) |
|------------|---------------------|-------------------------------------|----------------------------|----------------------------|-------------------------------------------|
| synephrine | Y=0.36x+0.1901      | 1.5625-25                           | 39                         | 156                        | 0.9972                                    |

60

61 **Table S3** Method validation of synephrine in QP-3 samples by DART-MS.

| Real samples | Add (µg·mL <sup>-1</sup> ) | Recovery (%) | Intra-day precision (RSD, %, n=6) | Inter-day precision (RSD, %, n=9) | Repeatability (RSD,%) | Stability (RSD,%) |
|--------------|----------------------------|--------------|-----------------------------------|-----------------------------------|-----------------------|-------------------|
|              | 7                          | 100.71       | 6.08                              | 6.1                               |                       |                   |
| QP           | 17.5                       | 98.10        | 5.27                              | 5.3                               | 1.58                  | 5.83              |
|              | 21.8                       | 98.48        | 5.03                              | 5.0                               |                       |                   |

62

63

64

65

66

67 **Table S4** Comparison of DART-MS and HPLC-MS methods for the analysis of  
 68 synephrine in QP, CP, and GCP samples.

| Name (mg<br>g-1) | Citri<br>Pericarpium | Reticulatae | Citri<br>Viride | Reticulatae | Pericarpium | Citri<br>"Chachi" | reticulatae |
|------------------|----------------------|-------------|-----------------|-------------|-------------|-------------------|-------------|
|                  | DART-MS              | HPLC-<br>MS | DART-MS         |             | HPLC-<br>MS | DART-MS           | HPLC-<br>MS |
| synephrine       | 1.42                 | 1.48        | 1.57            |             | 1.61        | 1.13              | 1.15        |

69

70

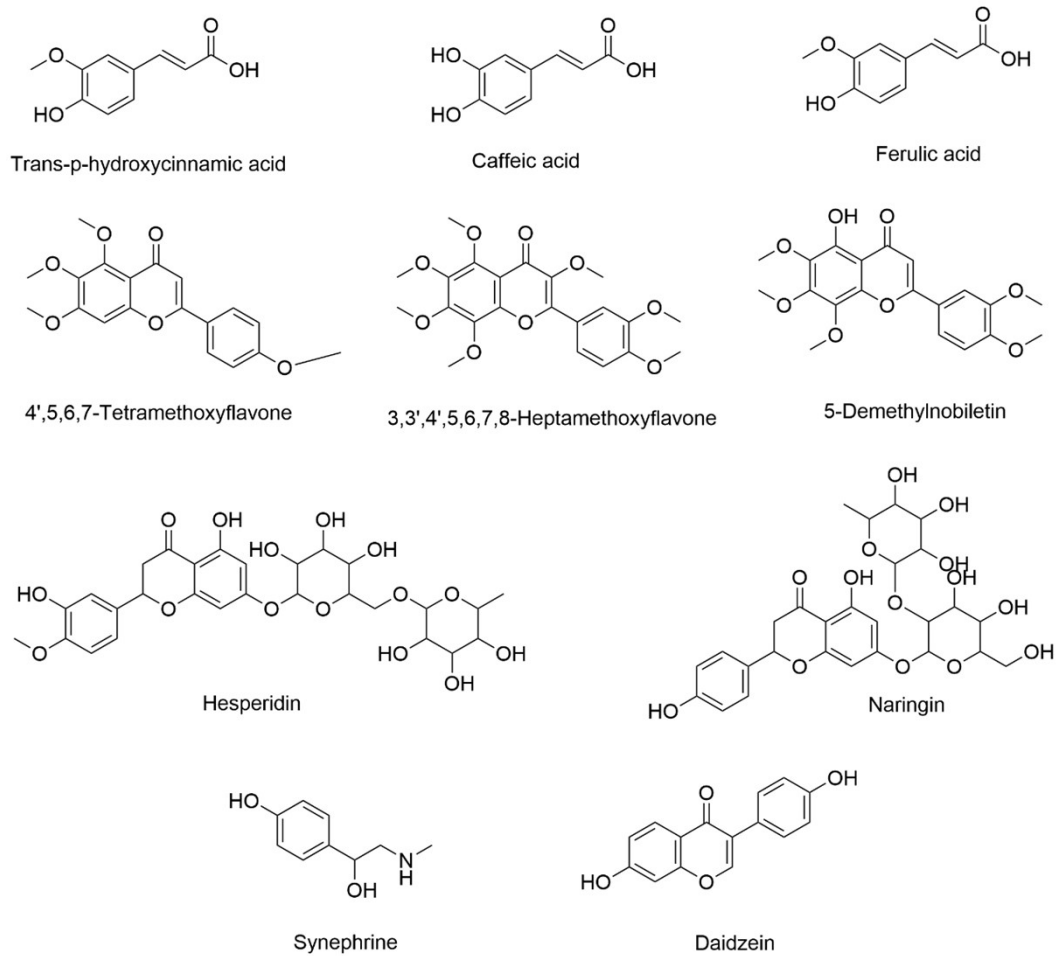

71

72 **Figure S1** The chemical structures and information of stand compounds used in this  
73 study.

74

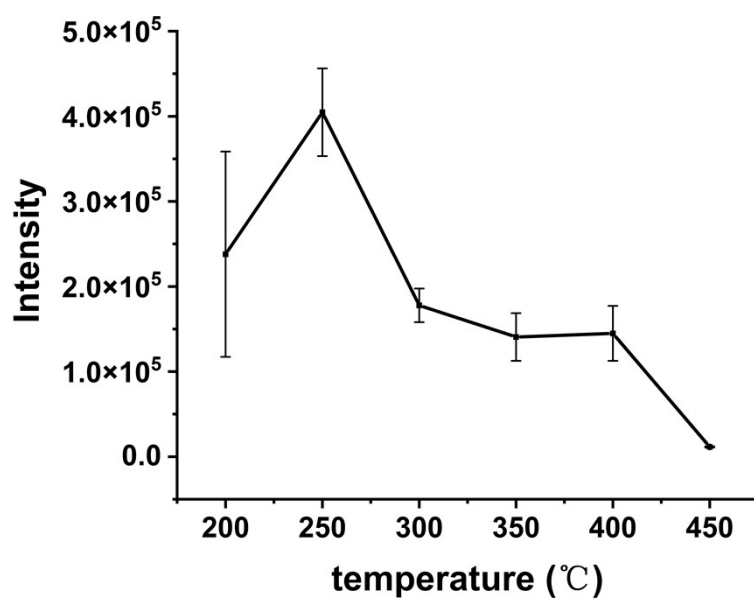

75

76 **Figure S2** The effect of gas heater temperature on the ionization efficiency of  
 77 synephrine.

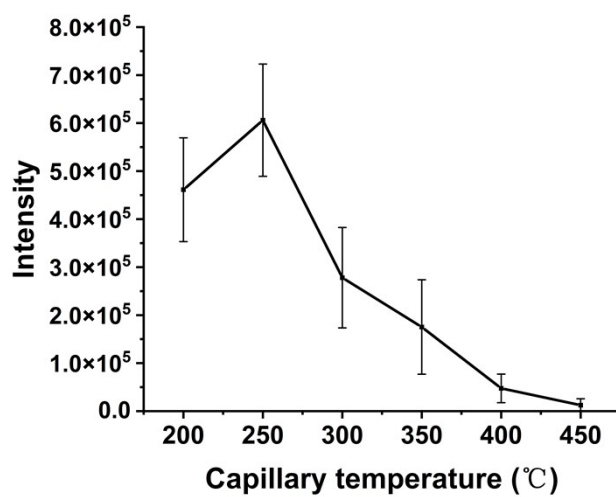

78

79 **Figure S3** The effect of MS capillary temperature on the ionization efficiency of  
 80 synephrine.

81

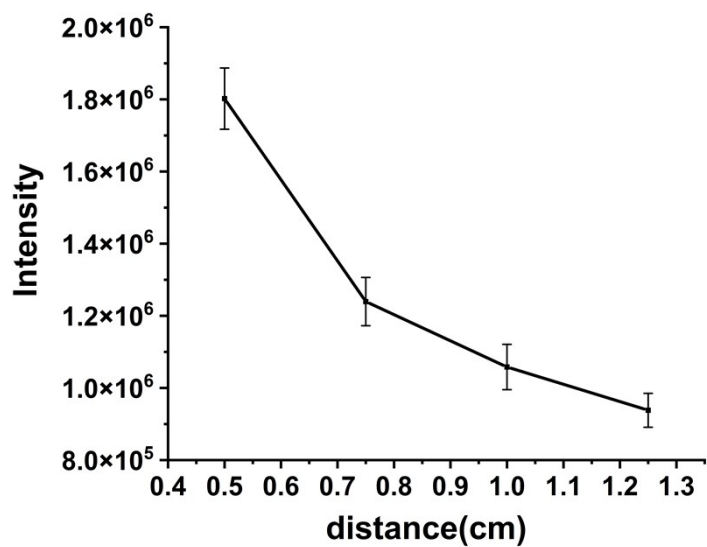

82

83 **Figure S4** The effect of distance between the ceramic tube of DART and MS inlet on  
 84 the ionization efficiency of synephrine.

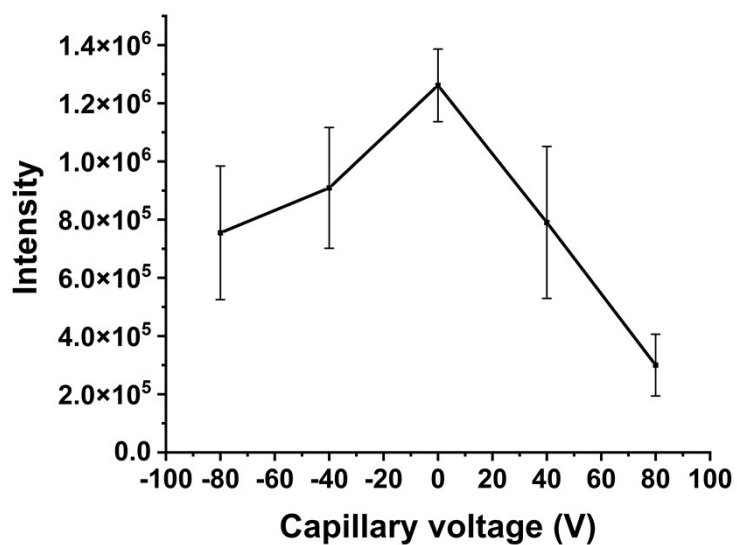

85

86 **Figure S5** The effect of MS capillary voltage on the ionization efficiency of synephrine.

87

88



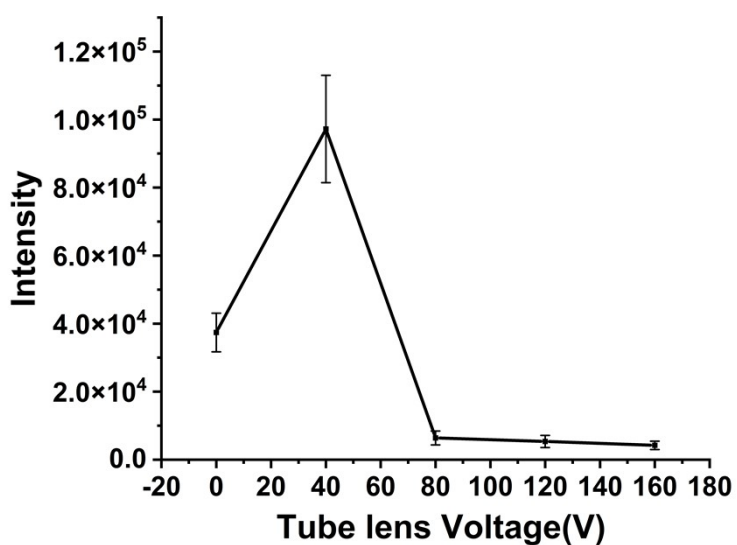

89

90 **Figure S6** The effect of MS tube lens voltage on the ionization efficiency of synephrine.

91

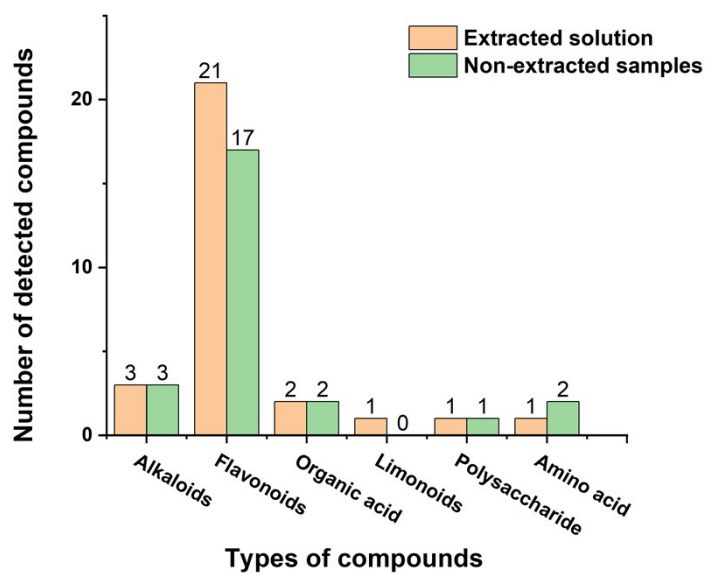

92

93 **Figure S7** Comparison of DART-MS analysis of extracted and unextracted samples.

94

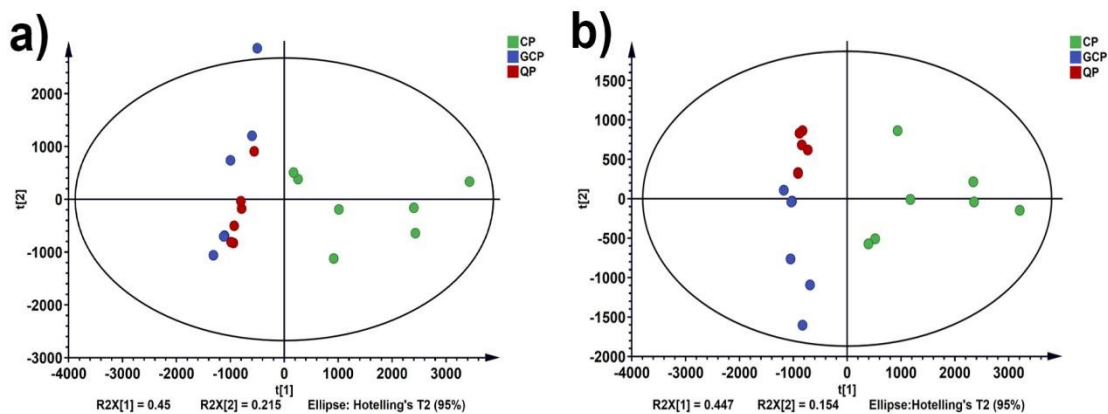

95

96 **Figure S8** PCA score plots (a) and PLS-DA (b) in the pairwise comparison

97 between QP, CP, and GCP samples. Samples are coloured based on their name.

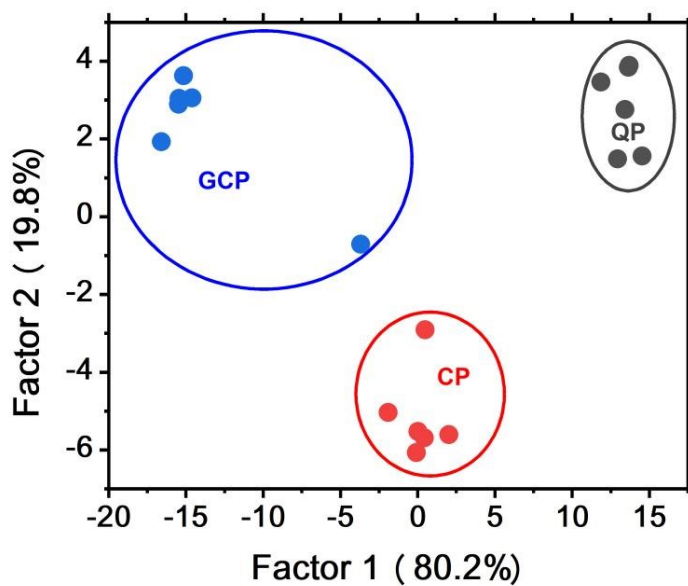

98

99 **Figure S9** Discriminant function score plot.

100

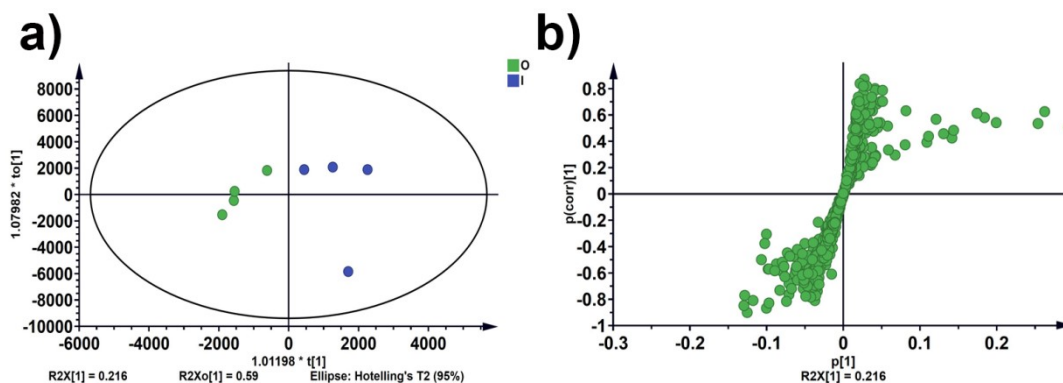

101

102 **Figure S10** OPLS-DA score plots (a) and S-plot (b) in the pairwise comparison  
 103 between inside and outside parts of CP samples.

104

105

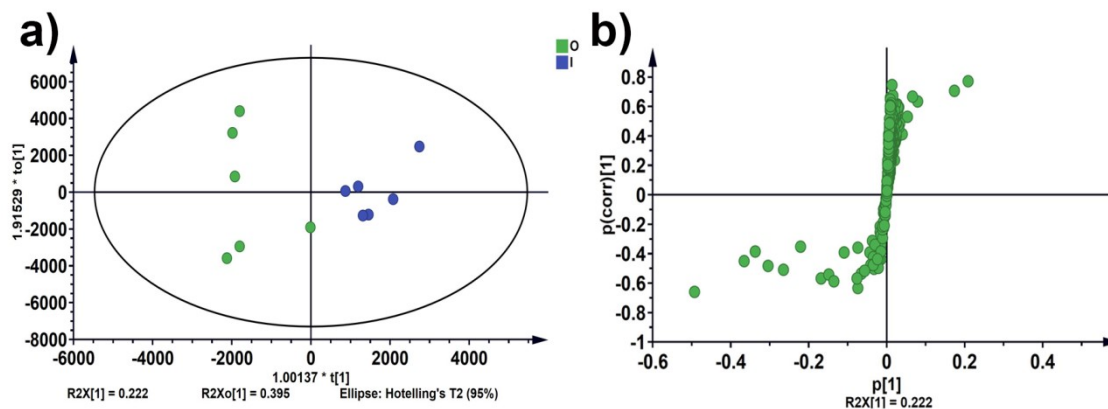

106

107 **Figure S11** OPLS-DA score plots (a) and S-plot (b) in the pairwise comparison  
 108 between inside and outside parts of QP samples.

109

110

111

112

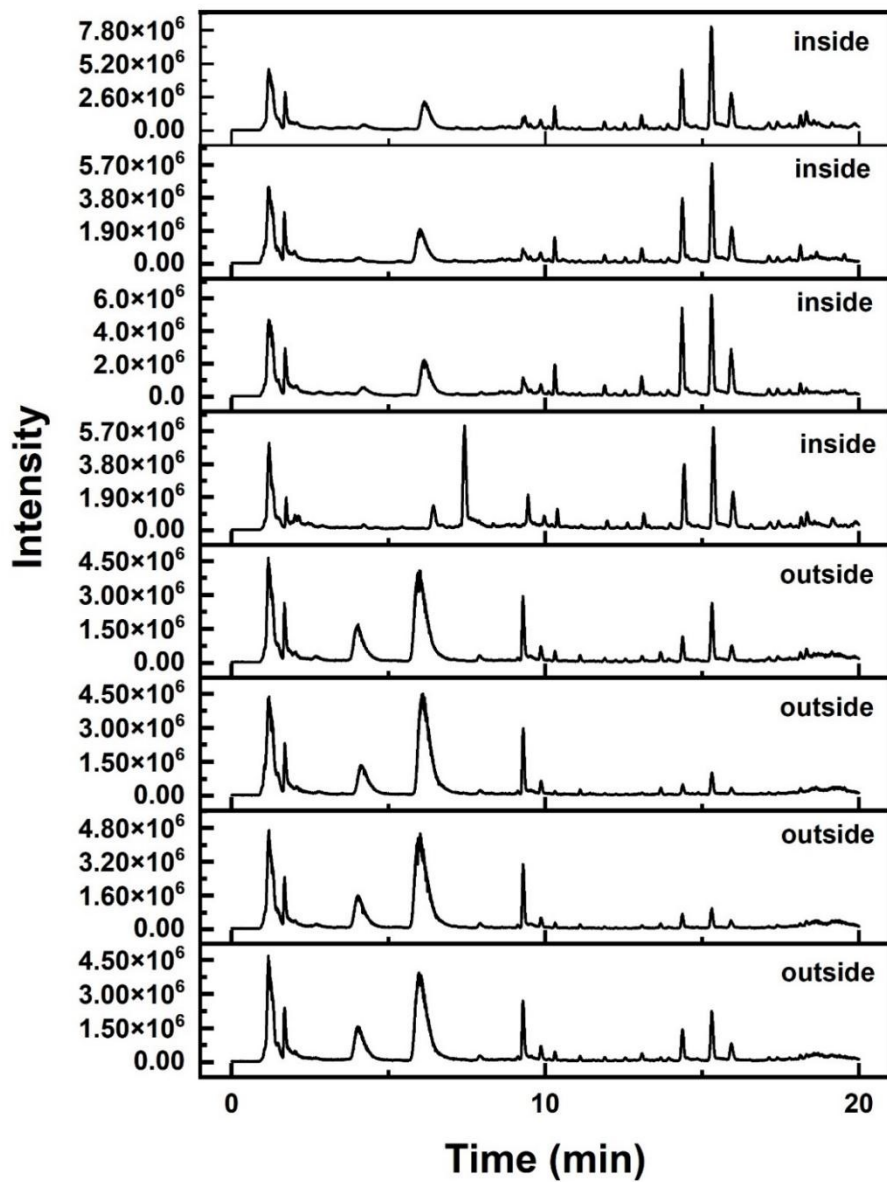

114

115 **Figure S12** The results of HPLC-MS inside and outside parts of CP samples.

116

117

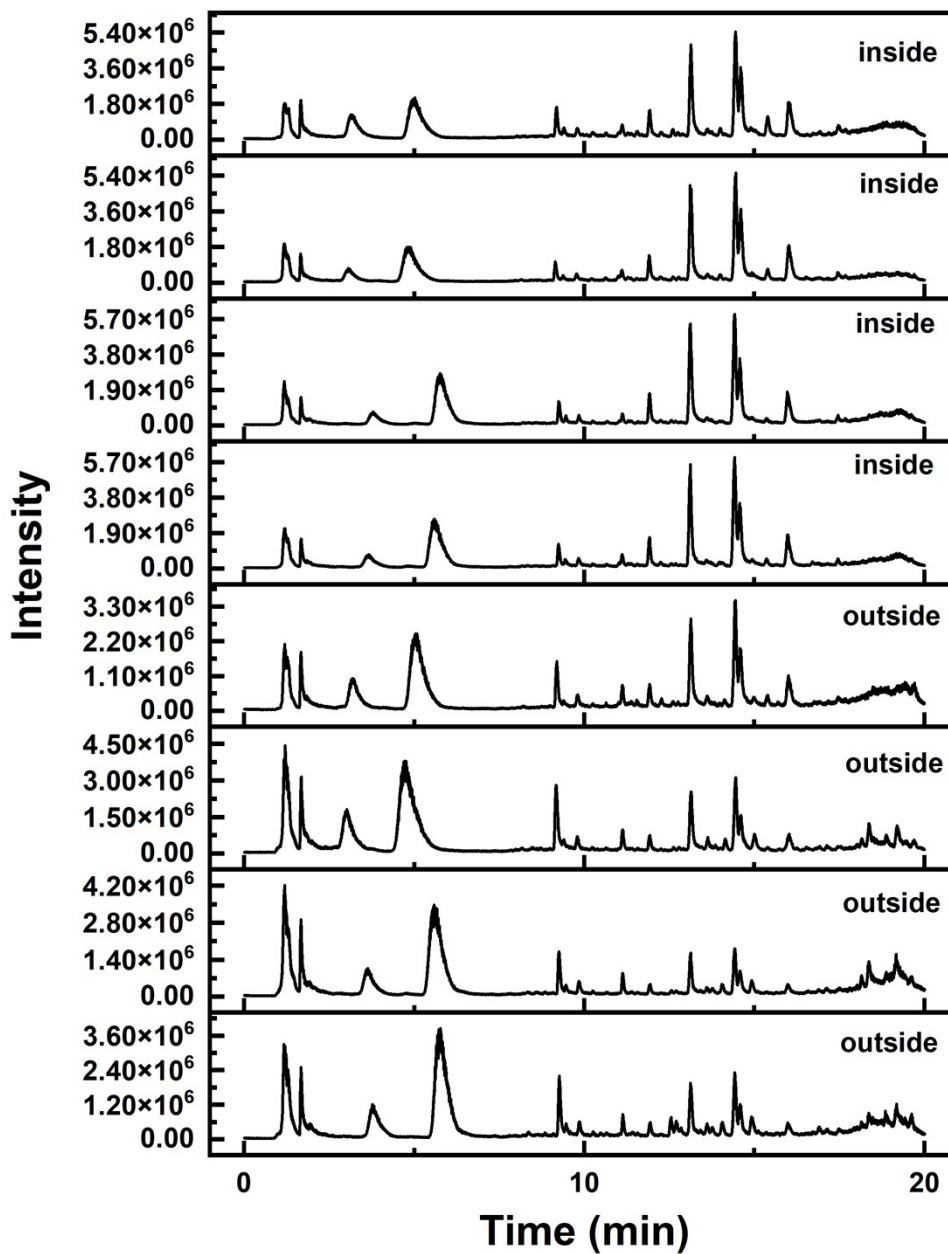

118

119 **Figure S13** The results of HPLC-MS inside and outside parts of QP samples.
